# Supplementary material for: Rapid hydrothermal synthesis of hierarchical ZSM-5/beta composite zeolites
Source: Royal Society of Chemistry journal article supplement (doi:10.1039/d1ra03064g), 2021-01-01
Supplement: d1ra03064g1.pdf [file d1ra03064g1.pdf]

## Supplementary Information

### Rapid hydrothermal synthesis of hierarchical ZSM-5/Beta composite zeolites

Guang Xiong,<sup>a\*</sup> Feifei Meng,<sup>a</sup> Liping Liu,<sup>a</sup> Jiaxu Liu<sup>a</sup> and Leping Zhao<sup>b</sup>

<sup>a</sup> Department of Catalytic Chemistry and Engineering & State Key Laboratory of Fine Chemicals, Dalian University of Technology, Dalian, 116024, China. E-mail: gxiong@dlut.edu.cn

<sup>b</sup> Dalian Research Institute of Petroleum and Petrochemicals SINOPEC Dalian, 116024, China. E-mail: zhaoleping.fshy@sinopec.com

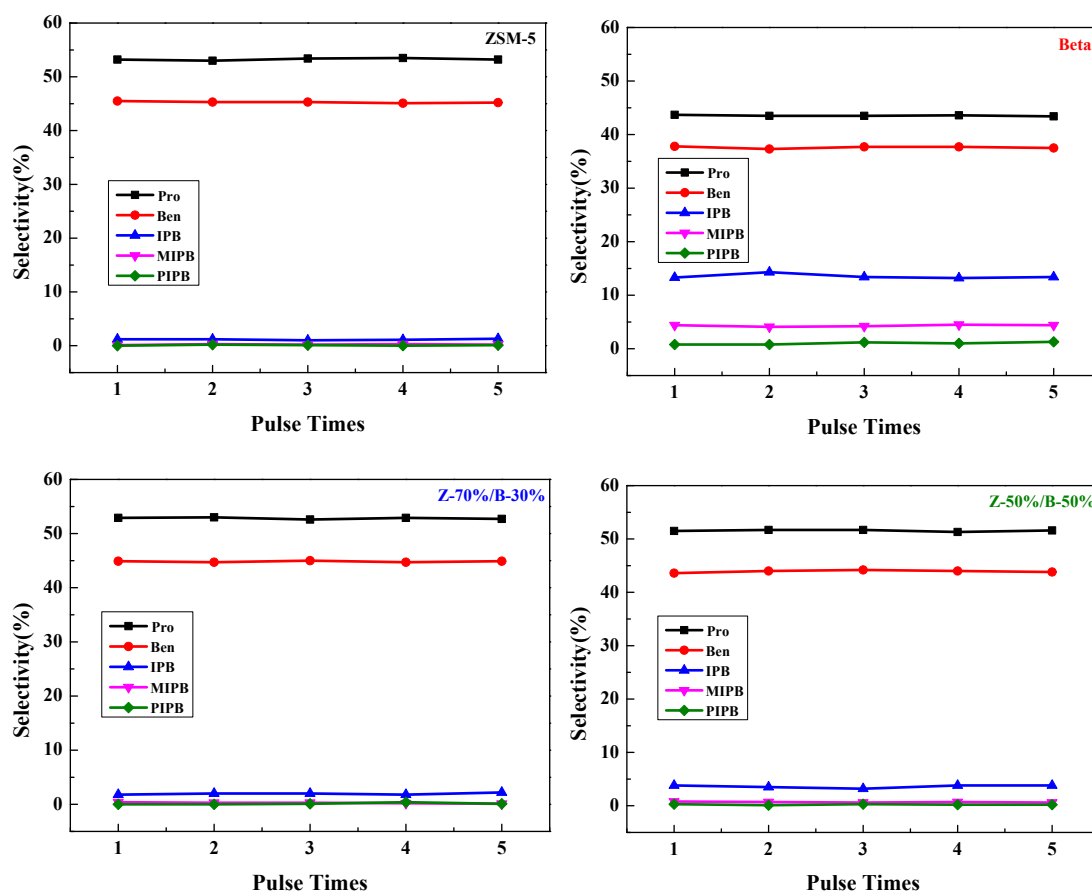

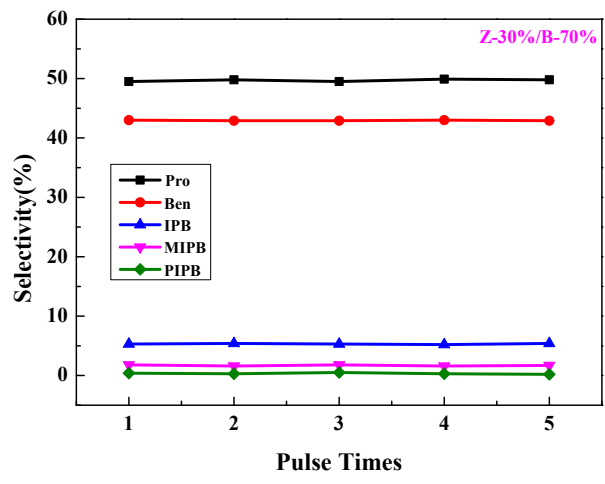

Fig.S1 Selectivities of each product over the Z-x/B-y samples at different pulse times.
